# Supplementary material for: Iron (Fe)-doped mesoporous 45S5 bioactive glasses: Implications for cancer therapy
Source: PubMed Central journal article supplement (PMC8972012; doi:10.1016/j.tranon.2022.101397), 2022-03-30
Supplement: mmc1.pdf [file mmc1.pdf]

**Table S1:** The calculated kinetic of Si-ions releasing during 168 h of incubations.

| <b>Time</b>                          | <b>Si</b> |       |        |       |        |
|--------------------------------------|-----------|-------|--------|-------|--------|
|                                      | Fe 0      | Fe 1  | Fe 2.5 | Fe 5  | Fe 7.5 |
| <b>0-24</b>                          | 1.08      | 1.375 | 1.83   | 2.20  | 2.43   |
| <b>24-72</b>                         | 1.77      | 1.85  | 2.16   | 2.10  | 2.45   |
| <b>72-168</b>                        | -0.54     | 0.27  | -1.10  | -1.07 | -1.16  |
| <b>Average</b>                       | 0.77      | 1.16  | 0.97   | 1.08  | 1.23   |
| <b>Increase compared to MBG-Fe 0</b> | 0         | 51.35 | 25.70  | 40.10 | 60.36  |

**Table S2:** The calculated kinetic of Na-ions releasing during 168 h of incubations.

| <b>Time</b>                          | <b>Na</b> |       |        |      |        |
|--------------------------------------|-----------|-------|--------|------|--------|
|                                      | Fe 0      | Fe 1  | Fe 2.5 | Fe 5 | Fe 7.5 |
| <b>0-24</b>                          | 1.75      | 2     | 2.25   | 2.33 | 2.54   |
| <b>24-72</b>                         | 0.042     | 0.042 | 0.041  | 0.13 | 0.14   |
| <b>72-168</b>                        | 0.042     | 0.031 | 0.031  | 0.06 | 0.041  |
| <b>Average</b>                       | 0.61      | 0.69  | 0.77   | 0.84 | 0.91   |
| <b>Increase compared to MBG-Fe 1</b> | 0         | 13.06 | 26.70  | 37.5 | 48.86  |

**Table S3:** The calculated kinetic of Ca-ions releasing during 168 h of incubations.

| <b>Time</b>                          | <b>Ca</b> |       |        |        |        |
|--------------------------------------|-----------|-------|--------|--------|--------|
|                                      | Fe 0      | Fe 1  | Fe 2.5 | Fe 5   | Fe 7.5 |
| <b>0-24</b>                          | 0.5       | 0.75  | 0.34   | 0.25   | 0.25   |
| <b>24-72</b>                         | 0.14      | 0.12  | 0.10   | 0.06   | 0.09   |
| <b>72-168</b>                        | 0.16      | 0.10  | 0.07   | 0.10   | 0.04   |
| <b>Average</b>                       | 0.27      | 0.33  | 0.17   | 0.13   | 0.12   |
| <b>Increase compared to MBG-Fe 0</b> | 0         | 20.51 | -37.17 | -48.71 | -53.84 |

**Table S4:** The calculated kinetic of P-ions releasing during 168 h of incubations.

| <b>Time</b>                          | <b>P</b> |       |        |       |        |
|--------------------------------------|----------|-------|--------|-------|--------|
|                                      | Fe 0     | Fe 1  | Fe 2.5 | Fe 5  | Fe 7.5 |
| <b>0-24</b>                          | -0.09    | -0.33 | -0.21  | -0.21 | -0.13  |
| <b>24-72</b>                         | -0.08    | -0.11 | -0.10  | -0.04 | -0.10  |
| <b>72-168</b>                        | -0.15    | -0.13 | -0.16  | -0.13 | -0.11  |
| <b>Average</b>                       | -0.10    | -0.18 | -0.15  | -0.13 | -0.10  |
| <b>Increase compared to MBG-Fe 0</b> | 0        | 78.95 | 34.90  | 21.71 | -4.60  |

**Table S5:** The calculated kinetic of Fe-ions releasing during 168 h of incubations.

| <b>Time</b>                          | <b>Fe</b> |      |        |        |        |
|--------------------------------------|-----------|------|--------|--------|--------|
|                                      | Fe 0      | Fe 1 | Fe 2.5 | Fe 5   | Fe 7.5 |
| <b>0-24</b>                          | 0         | 0.12 | 0.33   | 0.62   | 1      |
| <b>24-72</b>                         | 0         | 0.04 | 0.06   | 0.16   | 0.08   |
| <b>72-168</b>                        | 0         | 0.06 | 0.11   | 0.15   | 0.16   |
| <b>Average</b>                       | 0         | 0.07 | 0.17   | 0.32   | 0.42   |
| <b>Increase compared to MBG-Fe 1</b> | -         | 0    | 122.72 | 309.10 | 445.41 |
